# Supplementary material
Source: MDPI journal article supplement (https://www.mdpi.com/2072-4292/15/13/3356)
Supplement: s1 [file s1]

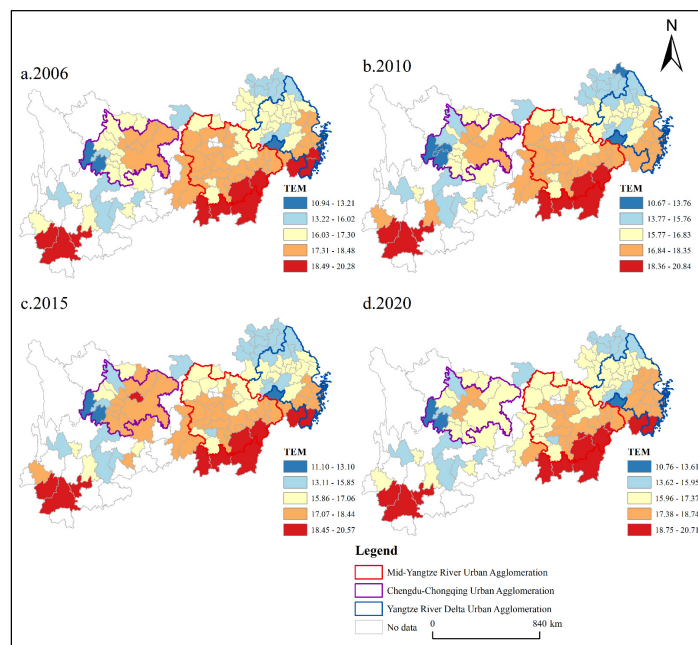

**Figure S1:** Evolution characteristics of the spatial pattern of TEM in the YREB from 2006 to 2020

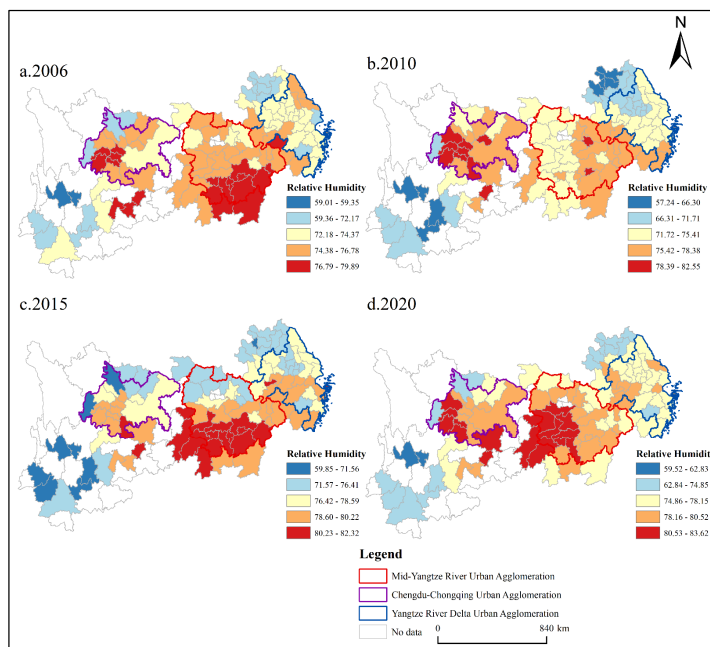

**Figure S2:** Evolution characteristics of the spatial pattern of HUM in the YREB from 2006 to 2020

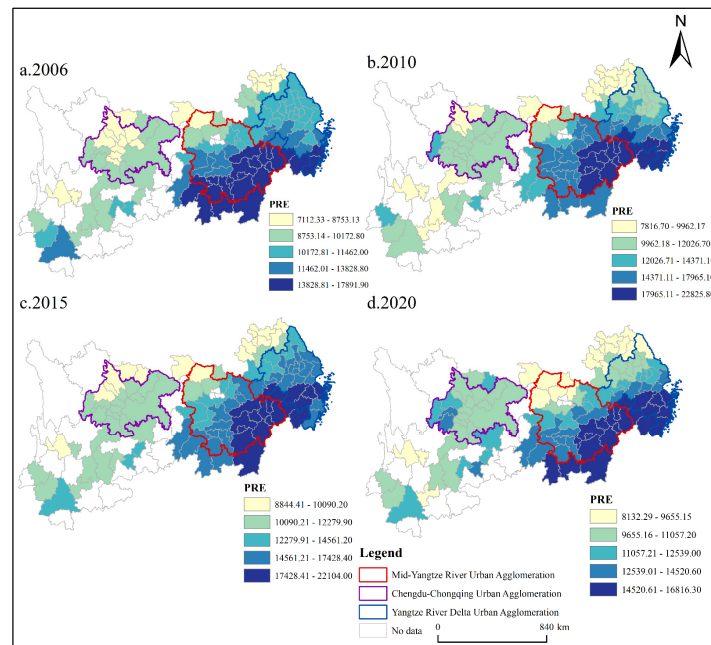

**Figure S3:** Evolution characteristics of the spatial pattern of PRE in the YREB from 2006 to 2020

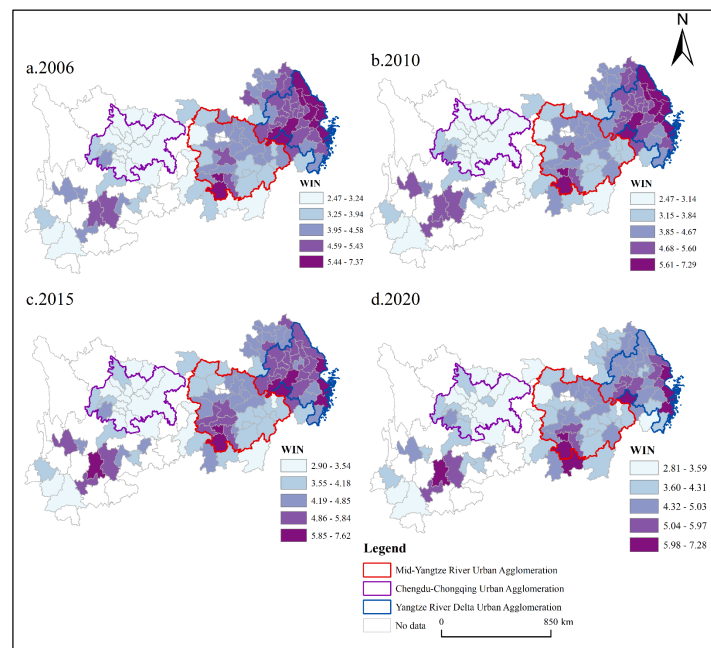

**Figure S4:** Evolution characteristics of the spatial pattern of WIN in the YREB from 2006 to 2020

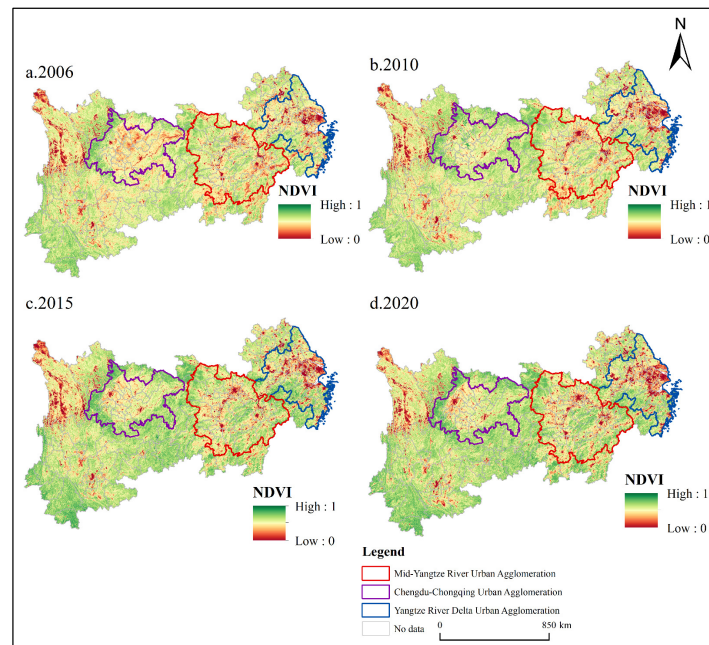

**Figure S5:** Evolution characteristics of the spatial pattern of NDVI in the YREB from 2006 to 2020

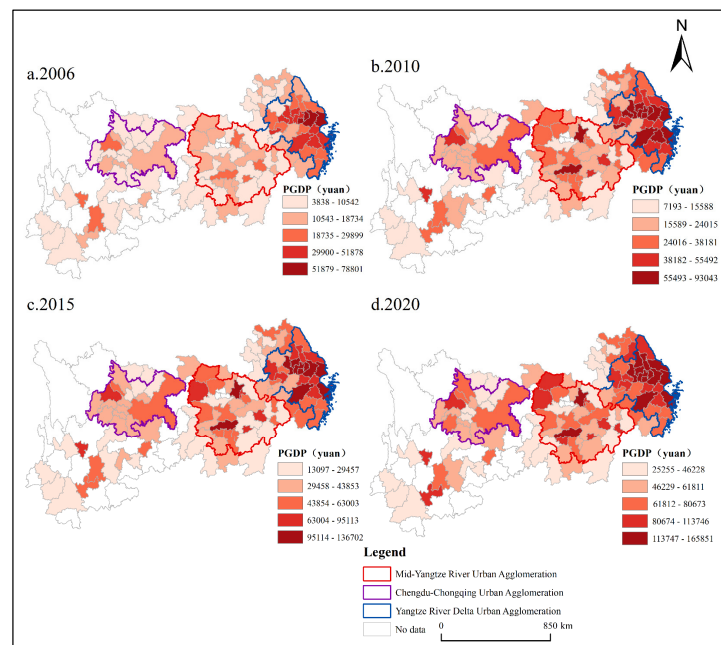

**Figure S6:** Evolution characteristics of the spatial pattern of PGDP in the YREB from 2006 to 2020

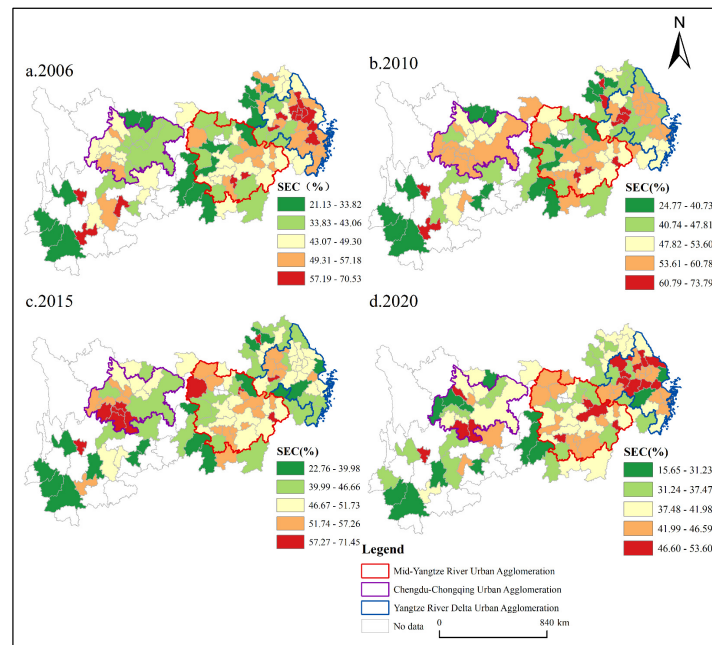

**Figure S7:** Evolution characteristics of the spatial pattern of SEC in the YREB from 2006 to 2020

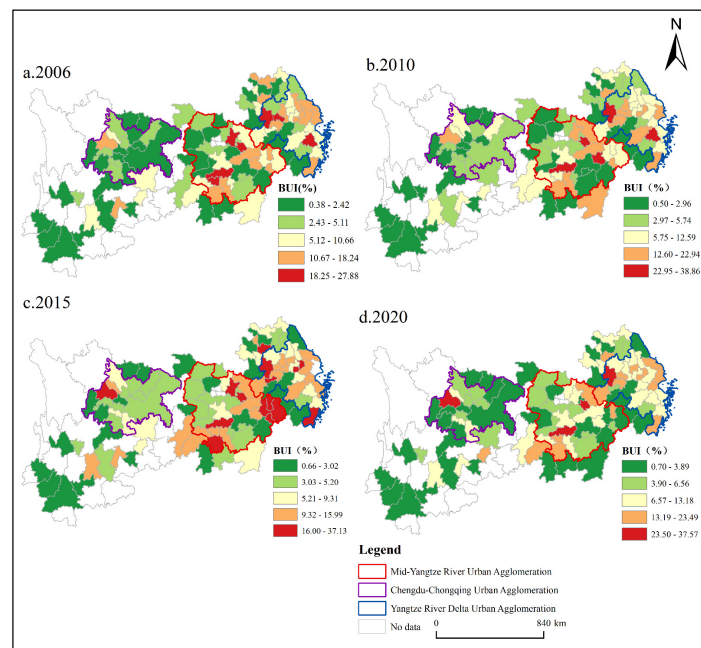

**Figure S8:** Evolution characteristics of the spatial pattern of BUI in the YREB from 2006 to 2020

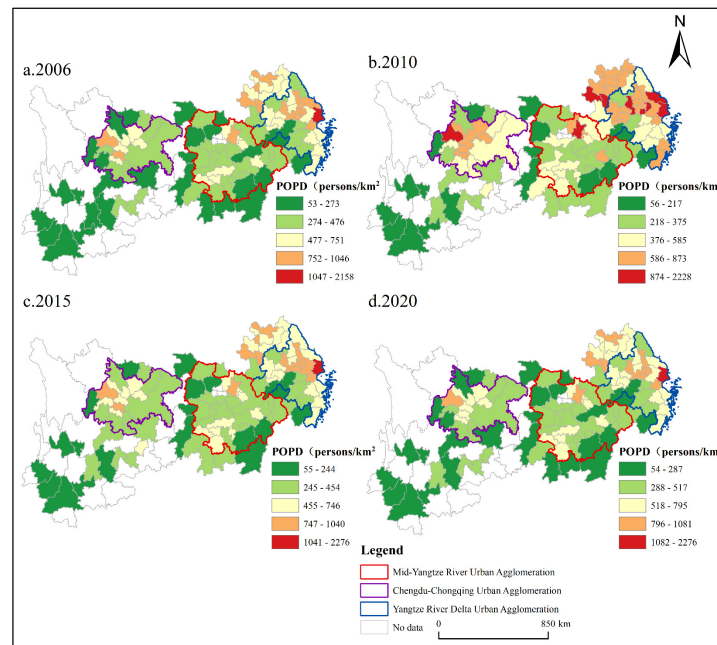

**Figure S9:** Evolution characteristics of the spatial pattern of POPD in the YREB from 2006 to 2020

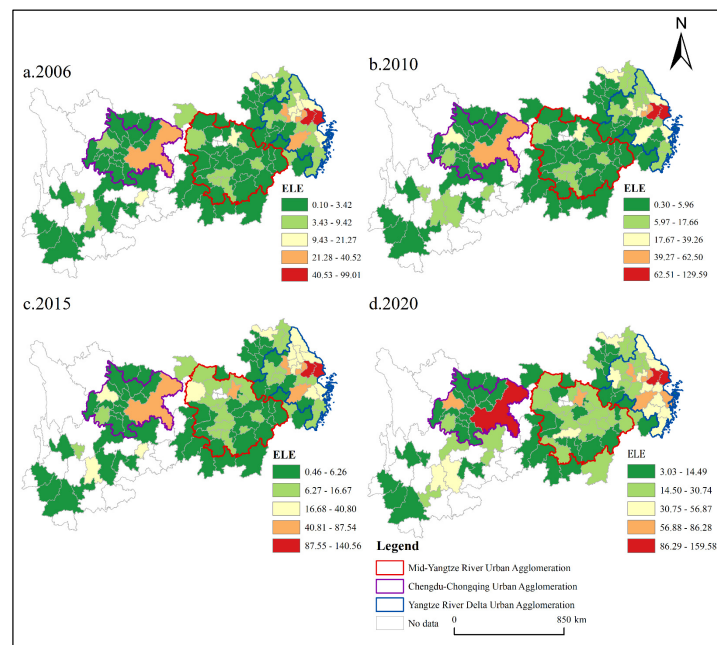

**Figure S10:** Evolution characteristics of the spatial pattern of ELE in the YREB from 2006 to 2020



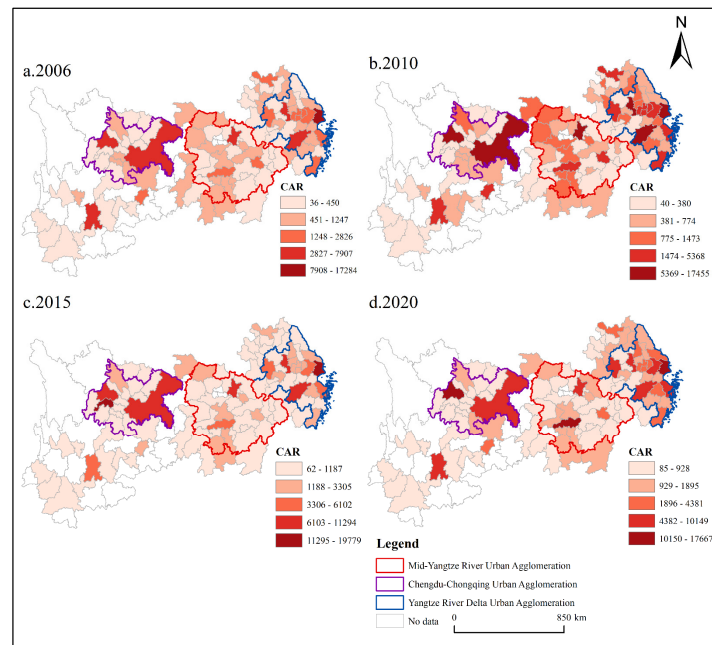

**Figure S11:** Evolution characteristics of the spatial pattern of CAR in the YREB from 2006 to 2020

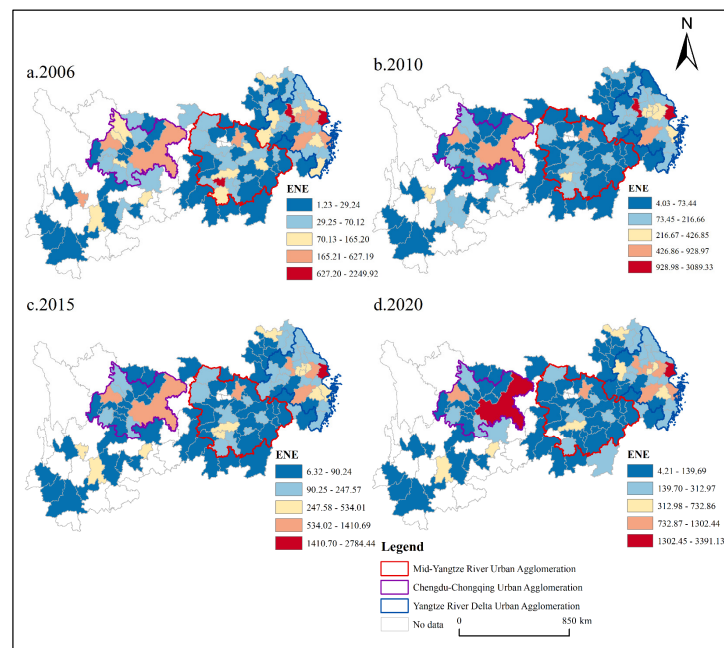

**Figure S12:** Evolution characteristics of the spatial pattern of ENE in the YREB from 2006 to 2020
